# Supplementary material
Source: publisher figshare collection journal article supplement (https://diabetesjournals.figshare.com/ndownloader/files/22899788)
Supplement: Supplementary file 1 [file 22899788]

**Supplementary (Suppl.) Table 1.** Cox regression models for DN progression, incident CHD and stroke, and all-cause mortality according to the three groups: RH, no RH and controlled BP in men with type 1 diabetes; RH 140 (22.5%); no RH 366 (58.9%); Controlled BP 115 (18.5%)

|                                                | Model 1                    | Model 2                    | Model 3                    | Model 4                  | Model 5                  |
|------------------------------------------------|----------------------------|----------------------------|----------------------------|--------------------------|--------------------------|
| <b>DN progression</b> (N=621, 189 events)      |                            |                            |                            |                          |                          |
| RH                                             | 3.34 (2.14, 5.23), <0.0001 | 3.70 (2.35, 5.83), <0.0001 | 2.70 (1.67, 4.35), <0.0001 | 2.21 (1.36, 3.59), 0.001 | 1.98 (1.21, 3.24), 0.006 |
| No RH                                          | 1.06 (0.69, 1.65), 0.8     | 1.13 (0.73, 1.75), 0.6     | 1.05 (0.67, 1.66), 0.8     | 1.05 (0.67, 1.64), 0.8   | 1.14 (0.72, 1.80), 0.6   |
| Controlled BP                                  | Reference                  | Reference                  | Reference                  | Reference                | Reference                |
| <b>Incident CHD</b> (N=564, 132 events)        |                            |                            |                            |                          |                          |
| RH                                             | 2.52 (1.36, 4.67), 0.003   | 2.03 (1.09, 3.77), 0.02    | 1.73 (0.89, 3.36), 0.1     | 1.45 (0.74, 2.83), 0.3   | 1.41 (0.72, 2.78), 0.2   |
| No RH                                          | 1.82 (1.03, 3.22), 0.04    | 1.49 (0.84, 2.64), 0.2     | 1.44 (0.79, 2.62), 0.2     | 1.45 (0.80, 2.65), 0.2   | 1.46 (0.80, 2.65), 0.3   |
| Controlled BP                                  | Reference                  | Reference                  | Reference                  | Reference                | Reference                |
| <b>Incident stroke</b> (N=599, 92 events)      |                            |                            |                            |                          |                          |
| RH                                             | 2.26 (1.17, 4.37), 0.01    | 2.04 (1.05, 3.95), 0.03    | 2.00 (0.98, 4.12), 0.06    | 1.48 (0.70, 3.14), 0.3   | 1.21 (0.56, 2.62), 0.6   |
| No RH                                          | 1.28 (0.70, 2.36), 0.4     | 1.17 (0.63, 2.15), 0.6     | 1.30 (0.69, 2.48), 0.4     | 1.30 (0.69, 2.48), 0.4   | 1.27 (0.67, 2.41), 0.5   |
| Controlled BP                                  | Reference                  | Reference                  | Reference                  | Reference                | Reference                |
| <b>All-cause mortality</b> (N=621, 181 deaths) |                            |                            |                            |                          |                          |
| RH                                             | 2.16 (1.35, 3.46), 0.001   | 1.87 (1.17, 2.99), 0.009   | 1.33 (0.81, 2.21), 0.2     | 0.95 (0.57, 1.58), 0.8   | 0.86 (0.51, 1.47), 0.6   |
| No RH                                          | 1.24 (0.80, 1.93), 0.3     | 1.10 (0.71, 1.71), 0.7     | 1.04 (0.66, 1.63), 0.9     | 1.00 (0.64, 1.57), 1.0   | 0.99 (0.63, 1.56), 1.0   |
| Controlled BP                                  | Reference                  | Reference                  | Reference                  | Reference                | Reference                |

Data are HR (95% CI) and p-values (Controlled BP reference group).

Model 1: Unadjusted

Model 2: Adjusted for age/age group (age ≤35, 36-45, 46-55 and >55 years)

Model 3: Model 2 + HbA<sub>1c</sub>, WHR, triglycerides, smoking and previous CHD and/or previous stroke

Model 4: Model 3 + nephropathy status

Model 5: Model 4 + eGFR/renal stage group (eGFR >90, 60-90 and <60 ml/min/1.73 m<sup>2</sup>)

**Suppl. Table 2.** Cox regression models for DN progression, incident CHD and stroke, and all-cause mortality according to the three groups: RH, no RH and controlled BP in women with type 1 diabetes; RH 66 (13.7%), no RH (56.6%), controlled BP 143 (29.7%)

|                                                 | Unadjusted                  | Model 1                    | Model 2                  | Model 3                 | Model 4                 |
|-------------------------------------------------|-----------------------------|----------------------------|--------------------------|-------------------------|-------------------------|
| <b>DN progression</b> ( N=482, 132 events)      |                             |                            |                          |                         |                         |
| RH                                              |                             |                            |                          |                         |                         |
| No RH                                           | (see Suppl. Fig. 2A)*       | (see Suppl. Fig. 2B)*      | (see Suppl. Fig. 2C)*    | (see Suppl. Fig. 2D)*   | (see Suppl. Fig. 2E)*   |
| Controlled BP                                   |                             |                            |                          |                         |                         |
| <b>Incident CHD</b> (N=451, 107 events)         |                             |                            |                          |                         |                         |
| RH                                              |                             |                            |                          |                         |                         |
| No RH                                           | (see Suppl. Fig. 3A)*       | (see Suppl. Fig. 3B)*      | (see Suppl. Fig. 3C)*    | (see Suppl. Fig. 3D)*   | (see Suppl. Fig. 3E)*   |
| Controlled BP                                   |                             |                            |                          |                         |                         |
| <b>Incident stroke</b> ( N=465, 46 events)      |                             |                            |                          |                         |                         |
| RH                                              | 7.15 (2.51, 20.31), 0.0002  | 5.54 (1.91, 16.09), 0.002  | 4.16 (1.37, 12.60), 0.01 | 3.09 (1.01, 9.46), 0.05 | 2.44 (0.78, 7.66), 0.1  |
| No RH                                           | 3.39 (1.31, 8.75), 0.01     | 2.63 (0.99, 6.98 ), 0.05   | 2.38 (0.89, 6.38), 0.08  | 2.38 (0.89, 6.36), 0.08 | 2.34 (0.88, 6.28), 0.09 |
| Controlled BP                                   | Reference                   | Reference                  | Reference                | Reference               | Reference               |
| <b>All-cause mortality</b> ( N=482, 121 deaths) |                             |                            |                          |                         |                         |
| RH                                              | 5.66 (3.17, 10.10), <0.0001 | 3.97 (2.18, 7.22), <0.0001 | 2.59 (1.34, 4.99), 0.004 | 2.26 (1.18, 4.35), 0.01 | 1.95 (1.02, 3.75), 0.04 |
| No RH                                           | 2.35 (1.38, 4.00), 0.002    | 1.78 (1.02, 3.08), 0.04    | 1.43 (0.80, 2.55), 0.2   | 1.46 (0.82, 2.61), 0.2  | 1.78 (0.99, 3.18), 0.05 |
| Controlled BP                                   | Reference                   | Reference                  | Reference                | Reference               | Reference               |

Data are HR (95% CI) and p-values (Controlled BP reference group). \*Time-varying effect of dependent variable.

Model 1: Unadjusted

Model 2: Adjusted for age/age group (age ≤35, 36-45, 46-55 and >55 years)

Model 3: Model 2 + HbA<sub>1c</sub>, WHR, triglycerides, smoking and previous CHD and/or previous stroke

Model 4: Model 3 + nephropathy status

Model 5: Model 4 + eGFR/renal stage (eGFR >90, 60-90 and <60 ml/min/1.73 m<sup>2</sup>)

**Suppl. Table 3.** Cox regression models for DN progression, incident CHD and stroke, and all-cause mortality according to the three groups: RH, no RH and controlled BP in individuals with normal AER or microalbuminuria and type 1 diabetes

|                                                | Model 1                   | Model 2                 | Model 3                  | Model 4                  |
|------------------------------------------------|---------------------------|-------------------------|--------------------------|--------------------------|
| <b>DN progression</b> (N=630, 95 events)       |                           |                         |                          |                          |
| RH                                             |                           |                         | 0.51 (0.16, 1.61), 0.2   | 0.50 (0.16, 1.58), 0.2   |
| No RH                                          | (see Suppl. Fig. 4A)*     | (see Suppl. Fig. 4B)*   | 0.87 (0.51, 1.50), 0.6   | 0.87 (0.50, 1.49), 0.6   |
| Controlled BP                                  |                           |                         | Reference                | Reference                |
| <b>Incident CHD</b> (N=573, 100 events)        |                           |                         |                          |                          |
| RH                                             | 3.74 (1.68, 8.33), 0.001  | 1.85 (0.81, 4.25), 0.1  | 1.52 (0.64, 3.63), 0.3   | 1.51 (0.63, 3.60), 0.3   |
| No RH                                          | 2.78 (1.51, 5.11), 0.001  | 1.84 (0.99, 3.45), 0.05 | 1.67 (0.88, 3.15), 0.1   | 1.69 (0.89, 3.19), 0.1   |
| Controlled BP                                  | Reference                 | Reference               | Reference                | Reference                |
| <b>Incident stroke</b> (N=616, 56 events)      |                           |                         |                          |                          |
| RH                                             | 4.99 (1.81, 13.78), 0.002 | 3.19 (1.13, 8.97), 0.03 | 3.55 (1.22, 10.35), 0.02 | 3.49 (1.20, 10.15), 0.02 |
| No RH                                          | 2.60 (1.17, 5.81), 0.02   | 1.95 (0.86, 4.39), 0.1  | 2.01 (0.88, 4.58), 0.1   | 2.01 (0.89, 4.58), 0.09  |
| Controlled BP                                  | Reference                 | Reference               | Reference                | Reference                |
| <b>All-cause mortality</b> (N=630, 109 deaths) |                           |                         |                          |                          |
| RH                                             | 2.93 (1.49, 5.76), 0.002  | 1.48 (0.74, 2.99), 0.3  | 1.44 (0.66, 3.10), 0.3   | 1.32 (0.61, 2.88), 0.5   |
| No RH                                          | 1.70 (1.02, 2.81), 0.04   | 1.15 (0.69, 1.93), 0.6  | 1.30 (0.77, 2.19), 0.3   | 1.32 (0.78, 2.22), 0.3   |
| Controlled BP                                  | Reference                 | Reference               | Reference                | Reference                |

Data are HR (95% CI) and p-values (Controlled BP reference group). \*Time-varying effect of dependent variable.

Model 1: Unadjusted

Model 2: Adjusted for age/age group (age  $\leq 35$ , 36-45, 46-55 and  $>55$  years) and sex

Model 3: Model 2 + HbA<sub>1C</sub>, WHR/WHR group (men WHR  $<0.95$ , 0.96-0.99,  $\geq 1.0$ ; women WHR  $<0.80$ , 0.81-0.85,  $\geq 0.86$ ), triglycerides, smoking and previous CHD and/or previous stroke

Model 4: Model 3 + eGFR/renal stage (eGFR  $>90$ , 60-90 and  $<60$  ml/min/1.73 m<sup>2</sup>)

**Suppl. Table 4.** Cox regression models for DN progression, incident CHD and stroke, and all-cause mortality according to the three groups: RH, no RH and controlled BP in individuals with macroalbuminuria and type 1 diabetes

|                                                | Model 1                    | Model 2                    | Model 3                    | Model 4                   |
|------------------------------------------------|----------------------------|----------------------------|----------------------------|---------------------------|
| <b>DN progression</b> (N=473, 226 events)      |                            |                            |                            |                           |
| RH                                             | 2.91 (1.98, 4.28), <0.0001 | 3.35 (2.24, 5.01), <0.0001 | 3.18 (2.05, 4.93), <0.0001 | 2.17 (1.41, 3.34), 0.0004 |
| No RH                                          | 0.95 (0.64, 1.41), 0.8     | 1.02 (0.69, 1.53), 0.9     | 1.01 (0.66, 1.55), 1.0     | 0.99 (0.64, 1.51), 0.9    |
| Controlled BP                                  | Reference                  | Reference                  | Reference                  | Reference                 |
| <b>Incident CHD</b> (N=442, 139 events)        |                            |                            |                            |                           |
| RH                                             | 1.84 (1.10, 3.07), 0.02    | (see Suppl. Fig. 5A)*      | 1.40 (0.80, 2.45), 0.2     | 1.32 (0.75, 2.33), 0.3    |
| No RH                                          | 1.51 (0.93, 2.46), 0.1     |                            | 1.18 (0.70, 2.00), 0.5     | 1.18 (0.69, 1.99), 0.5    |
| Controlled BP                                  | Reference                  |                            | Reference                  | Reference                 |
| <b>Incident stroke</b> (N=450, 82 events)      |                            |                            |                            |                           |
| RH                                             | 2.18 (1.10, 4.33), 0.03    | 1.62 (0.80, 3.29), 0.2     | 1.50 (0.69, 3.23), 0.3     | 1.12 (0.51, 2.45), 0.8    |
| No RH                                          | 1.54 (0.79, 3.01), 0.2     | 1.25 (0.63, 2.47), 0.5     | 1.25 (0.61, 2.55), 0.5     | 1.31 (0.64, 2.69), 0.5    |
| Controlled BP                                  | Reference                  | Reference                  | Reference                  | Reference                 |
| <b>All-cause mortality</b> (N=473, 193 deaths) |                            |                            |                            |                           |
| RH                                             | 2.41 (1.51, 3.83), 0.0002  | 1.83 (1.13, 2.95), 0.01    | 1.32 (0.79, 2.20), 0.3     | 1.14 (0.68, 1.93), 0.6    |
| No RH                                          | 1.71(1.08, 2.70), 0.02     | 1.32 (0.82, 2.11), 0.2     | 1.17 (0.72, 1.90), 0.5     | 1.19 (0.73, 1.93), 0.5    |
| Controlled BP                                  | Reference                  | Reference                  | Reference                  | Reference                 |

Data are HR (95% CI) and p-values (Controlled BP reference group). \*Time-varying effect of dependent variable.

Model 1: Unadjusted

Model 2: Adjusted for age and sex

Model 3: Model 2 + HbA<sub>1c</sub>, WHR/WHR group (men WHR <0.95, 0.96-0.99, ≥1.0; women WHR <0.80, 0.81-0.85, ≥0.86), triglycerides /triglycerides control (triglycerides <2.3, 2.3-4.5, and >4.5 mmol/l), smoking and previous CHD and/or previous stroke

Model 4: Model 3 + eGFR/renal stage (eGFR >90, 60-90 and <60 ml/min/1.73 m<sup>2</sup>)

**Suppl. Table 5.** Cox regression models for DN progression, incident CHD and stroke, and all-cause mortality according to the three groups: RH, no RH and controlled BP in individuals with eGFR  $\geq 60$  ml/min/1.73 m<sup>2</sup> and type 1 diabetes

|                                                | Model 1                   | Model 2                 | Model 3                 | Model 4                 |
|------------------------------------------------|---------------------------|-------------------------|-------------------------|-------------------------|
| <b>DN progression</b> (N=749, 111 events)      |                           |                         |                         |                         |
| RH                                             |                           |                         |                         |                         |
| No RH                                          | (see Suppl. Fig. 6A)*     | (see Suppl. Fig. 6B)*   | (see Suppl. Fig. 6C)*   | (see Suppl. Fig. 6D)*   |
| Controlled BP                                  |                           |                         |                         |                         |
| <b>Incident CHD</b> (N=703, 132 events)        |                           |                         |                         |                         |
| RH                                             | 2.45 (1.20, 5.01), 0.01   | 1.57 (0.75, 3.27), 0.2  | 1.40 (0.64, 3.06), 0.4  | 1.26 (0.57, 2.80), 0.6  |
| No RH                                          | 2.48 (1.50, 4.10), 0.0004 | 1.82 (1.09, 3.06), 0.02 | 1.77 (1.03, 3.03), 0.04 | 1.81 (1.05, 3.11), 0.03 |
| Controlled BP                                  | Reference                 | Reference               | Reference               | Reference               |
| <b>Incident stroke</b> (N=735, 59 events)      |                           |                         |                         |                         |
| RH                                             | 2.64 (0.91, 7.61), 0.07   | 1.91 (0.65, 5.62), 0.2  | 2.30 (0.77, 6.92), 0.1  | 2.48 (0.82, 7.50), 0.1  |
| No RH                                          | 2.46 (1.16, 5.22), 0.02   | 1.98 (0.92, 4.26), 0.08 | 2.05 (0.95, 4.44), 0.07 | 2.16 (1.00, 4.68), 0.05 |
| Controlled BP                                  | Reference                 | Reference               | Reference               | Reference               |
| <b>All-cause mortality</b> (N=749, 136 deaths) |                           |                         |                         |                         |
| RH                                             | 3.25 (1.76, 6.01), 0.0002 | 2.15 (1.15, 4.02), 0.02 | 2.20 (1.13, 4.31), 0.02 | 2.04 (1.04, 4.02), 0.04 |
| No RH                                          | 1.91 (1.19, 3.07), 0.007  | 1.43 (0.88, 2.32), 0.1  | 1.48 (0.90, 2.45), 0.1  | 1.50 (0.91, 2.48), 0.1  |
| Controlled BP                                  | Reference                 | Reference               | Reference               | Reference               |

Data are HR (95% CI) and p-values (Controlled BP reference group). \*Time-varying effect of dependent variable.

Model 1: Unadjusted

Model 2: Adjusted for age/age group (age  $\leq 35$ , 36-45, 46-55 and  $>55$  years) and sex

Model 3: Model 2 + HbA<sub>1C</sub>/glycemic control (HbA<sub>1C</sub>  $<7.5$ , 7.5-8.99;  $>9.0$  %), WHR, triglycerides, smoking and previous CHD and/or previous stroke

Model 4: Model 3 + eGFR/renal stage (eGFR  $>90$ , 60-90 and  $<60$  ml/min/1.73 m<sup>2</sup>)

**Suppl. Table 6.** Cox regression models for DN progression, incident CHD and stroke, and all-cause mortality according to the three groups: RH, no RH and controlled BP in individuals with eGFR < 60 ml/min/1.73 m<sup>2</sup> and type 1 diabetes

|                                                | Model 1                   | Model 2                   | Model 3                   | Model 4                  |
|------------------------------------------------|---------------------------|---------------------------|---------------------------|--------------------------|
| <b>DN progression</b> (N=349, 210 events)      |                           |                           |                           |                          |
| RH                                             | 1.96 (1.33, 2.89), 0.0007 | 2.13 (1.43, 3.18), 0.0002 | 2.25 (1.45, 3.47), 0.0003 | 2.00 (1.24, 3.22), 0.004 |
| No RH                                          | 0.81 (0.54, 1.22), 0.3    | 0.88 (0.58, 1.33), 0.5    | 0.95 (0.61, 1.47), 0.8    | 1.00 (0.62, 1.62), 1.0   |
| Controlled BP                                  | Reference                 | Reference                 | Reference                 | Reference                |
| <b>Incident CHD</b> (N=308, 107 events)        |                           |                           |                           |                          |
| RH                                             | 1.71 (0.95, 3.05), 0.07   | 1.46 (0.81, 2.63), 0.2    | 1.31 (0.70, 2.44), 0.4    | 1.21 (0.64, 2.26), 0.5   |
| No RH                                          | 1.38 (0.77, 2.47), 0.3    | 1.10 (0.61, 1.99), 0.7    | 0.91 (0.49, 1.71), 0.8    | 0.87 (0.47, 1.64), 0.7   |
| Controlled BP                                  | Reference                 | Reference                 | Reference                 | Reference                |
| <b>Incident stroke</b> (N=326, 78 events)      |                           |                           |                           |                          |
| RH                                             | 1.87 (0.92, 3.79), 0.08   | 1.57 (0.77, 3.21), 0.2    | 1.53 (0.72, 3.27), 0.3    | 1.36 (0.63, 2.96), 0.4   |
| No RH                                          | 1.53 (0.75, 3.09), 0.2    | 1.30 (0.64, 2.63), 0.5    | 1.43 (0.68, 3.03), 0.3    | 1.36 (0.64, 2.90), 0.4   |
| Controlled BP                                  | Reference                 | Reference                 | Reference                 | Reference                |
| <b>All-cause mortality</b> (N=349, 165 deaths) |                           |                           |                           |                          |
| RH                                             | 1.74 (1.07, 2.82), 0.02   | 1.54 (0.94, 2.52), 0.08   | 1.16 (0.70, 1.94), 0.5    | 1.01 (0.60, 1.69), 0.9   |
| No RH                                          | 1.48 (0.91, 2.41), 0.1    | 1.20 (0.73, 1.97), 0.5    | 0.97 (0.58, 1.60), 0.9    | 0.90 (0.54, 1.50), 0.7   |
| Controlled BP                                  | Reference                 | Reference                 | Reference                 | Reference                |

Data are HR (95% CI) and p-values (Controlled BP reference group).

Model 1: Unadjusted

Model 2: Adjusted for age/age group (age ≤35, 36-45, 46-55 and >55 years) and sex

Model 3: Model 2 + HbA<sub>1c</sub>, WHR, triglycerides/ triglycerides control (triglycerides <2.3, 2.3-4.5, and >4.5 mmol/l), smoking and previous CHD and/or previous stroke

Model 4: Model 3 + eGFR/renal stage (eGFR >90, 60-90 and <60 ml/min/1.73 m<sup>2</sup>)

**Suppl. Table 7.** Cox regression models for DN progression, incident CHD and stroke, and all-cause mortality according to the three groups: RH, no RH and controlled BP in individuals with type 1 diabetes when the BP threshold was set <130/80 mmHg

|                                                 | Model 1                    | Model 2                    | Model 3                    | Model 4                   | Model 5                 |
|-------------------------------------------------|----------------------------|----------------------------|----------------------------|---------------------------|-------------------------|
| <b>DN progression</b> (N=1103, 321 events)      |                            |                            |                            |                           |                         |
| RH                                              |                            | 3.47 (2.41, 5.00), <0.0001 | 2.76 (1.85, 4.12), <0.0001 | 2.17 (1.44, 3.26), 0.0002 | 1.67 (1.11, 2.52), 0.01 |
| No RH                                           | (see Suppl. Fig. 7A)*      | 0.96 (0.68, 1.36), 0.8     | 0.93 (0.65, 1.34), 0.7     | 0.91 (0.63, 1.31), 0.6    | 0.93 (0.65, 1.34), 0.7  |
| Controlled BP                                   |                            | Reference                  | Reference                  | Reference                 | Reference               |
| <b>Incident CHD</b> (N=1015, 239 events)        |                            |                            |                            |                           |                         |
| RH                                              | 2.39 (1.50, 3.80), 0.0002  | 1.92 (1.20, 3.07), 0.007   | 1.57 (0.96, 2.59), 0.07    | 1.43 (0.87, 2.36), 0.1    | 1.36 (0.82, 2.27), 0.2  |
| No RH                                           | 1.45 (0.95, 2.22), 0.08    | 1.25 (0.81, 1.91), 0.3     | 1.17 (0.75, 1.82), 0.5     | 1.22 (0.78, 1.89), 0.4    | 1.23 (0.79, 1.92), 0.3  |
| Controlled BP                                   | Reference                  | Reference                  | Reference                  | Reference                 | Reference               |
| <b>Incident stroke</b> (N=1066, 138 events)     |                            |                            |                            |                           |                         |
| RH                                              | 3.16 (1.69, 5.91), 0.003   | 2.59 (1.38, 4.87), 0.003   | 2.38 (1.21, 4.68), 0.01    | 1.90 (0.95, 3.80), 0.07   | 1.52 (0.75, 3.09), 0.2  |
| No RH                                           | 1.59 (0.89, 2.86), 0.1     | 1.41 (0.78, 2.53), 0.2     | 1.47 (0.80, 2.72), 0.2     | 1.53 (0.83, 2.83), 0.2    | 1.57 (0.85, 2.90), 0.1  |
| Controlled BP                                   | Reference                  | Reference                  | Reference                  | Reference                 | Reference               |
| <b>All-cause mortality</b> (N=1103, 302 deaths) |                            |                            |                            |                           |                         |
| RH                                              | 2.96 (1.96, 4.46), <0.0001 | 2.46 (1.62, 3.72), <0.0001 | 1.72 (1.11, 2.66), 0.01    | 1.32 (0.85, 2.06), 0.2    | 1.23 (0.79, 1.93), 0.3  |
| No RH                                           | 1.41 (0.96, 2.08), 0.08    | 1.25 (0.85, 1.84), 0.3     | 1.16 (0.79, 1.73), 0.4     | 1.12 (0.76, 1.66), 0.6    | 1.13 (0.77, 1.68), 0.5  |
| Controlled BP                                   | Reference                  | Reference                  | Reference                  | Reference                 | Reference               |

Data are HR (95% CI) and p-values (Controlled BP reference group). \*Time-varying effect of dependent variable.

Model 1: Unadjusted

Model 2: Adjusted for age/age group (age ≤35, 36-45, 46-55 and >55 years)

Model 3: Model 2 + HbA<sub>1c</sub>, WHR, triglycerides, smoking and previous CHD and/or previous stroke

Model 4: Model 3 + nephropathy status

Model 5: Model 4 + eGFR/ renal stage (eGFR >90, 60-90 and <60 ml/min/1.73 m<sup>2</sup>)

**Suppl. Table 8.** List of physicians and nurses at each of the FinnDiane centers participating in patient recruitment and characterization

**The Finnish Diabetic Nephropathy Study Centers**

|                                                                                      |                                                                                                                                                                                                           |
|--------------------------------------------------------------------------------------|-----------------------------------------------------------------------------------------------------------------------------------------------------------------------------------------------------------|
| Anjalankoski Health Center                                                           | S.Koivula, T.Uggeldahl                                                                                                                                                                                    |
| Central Finland Central Hospital, Jyväskylä                                          | T.Forslund, A.Halonen, A.Koistinen, P.Koskiahio, M.Laukkanen, J.Saltevo, M.Tiihonen                                                                                                                       |
| Central Hospital of Åland Islands, Mariehamn                                         | M.Forsen, H.Granlund, A.-C.Jonsson, B.Nyroos                                                                                                                                                              |
| Central Hospital of Kanta-Häme, Hämeenlinna                                          | P.Kinnunen, A.Orvola, T.Salonen, A.Vähänen                                                                                                                                                                |
| Central Hospital of Kymenlaakso, Kotka                                               | R.Paldanius, M.Riihelä, L.Ryysy                                                                                                                                                                           |
| Central Hospital of Länsi-Pohja, Kemi                                                | H.Laukkanen, P.Nyländen, A.Sademies                                                                                                                                                                       |
| Central Ostrobothnian Hospital District, Kokkola                                     | S.Anderson, B.Asplund, U.Byskata, P.Liedes, M.Kuusela, T.Virkkala                                                                                                                                         |
| City of Espoo Health Center:                                                         |                                                                                                                                                                                                           |
| Espoonlahti                                                                          | A.Nikkola, E.Ritola                                                                                                                                                                                       |
| Tapiola                                                                              | M.Niska, H.Saarinen                                                                                                                                                                                       |
| Samaria                                                                              | E.Oukko-Ruponen, T.Virtanen                                                                                                                                                                               |
| Viherlaakso                                                                          | A.Lyytinen                                                                                                                                                                                                |
| City of Helsinki Health Center:                                                      |                                                                                                                                                                                                           |
| Puistola                                                                             | H.Kari, T.Simonen                                                                                                                                                                                         |
| Suutarila                                                                            | A.Kaprio, J.Kärkkäinen, B.Rantaeskola                                                                                                                                                                     |
| Töölö                                                                                | P.Kääriäinen, J.Haaga, A.-L.Pietiläinen                                                                                                                                                                   |
| City of Hyvinkää Health Center                                                       | S.Klemetti, T.Nyandoto, E.Rontu, S.Satuli-Autere                                                                                                                                                          |
| City of Vantaa Health Center:                                                        |                                                                                                                                                                                                           |
| Korso                                                                                | R.Toivonen, H.Virtanen                                                                                                                                                                                    |
| Länsimäki                                                                            | R.Ahonen, M.Ivaska-Suomela, A.Jauhiainen                                                                                                                                                                  |
| Marttilaakso                                                                         | M.Laine, T.Pellonpää, R.Puranen                                                                                                                                                                           |
| Myyrämäki                                                                            | A.Airas, J.Laakso, K.Rautavaara                                                                                                                                                                           |
| Rekola                                                                               | M.Erola, E.Jatkola                                                                                                                                                                                        |
| Tikkurila                                                                            | R.Lönnblad, A.Malm, J.Mäkelä, E.Rautamo                                                                                                                                                                   |
| Heinola Health Center                                                                | P.Hentunen, J.Lagerstam                                                                                                                                                                                   |
| Helsinki University Central Hospital, Department of Medicine, Division of Nephrology | M.Fedoroff, D.Gordin, O.Heikkilä, K.Hietala, J.Fagerudd, M.Korolainen, L.Kyllönen, J.Kytö, S.Lindh, K.Pettersson-Fernholm, M.Rosengård-Bärlund, A.Sandelin, L.Thorn, J.Tuomikangas, T.Vesisenaho, J.Wadén |
| Herttoniemi Hospital, Helsinki                                                       | V.Sipilä                                                                                                                                                                                                  |
| Hospital of Lounais-Häme, Forssa                                                     | T.Kalliomäki, J.Koskelainen, R.Nikkanen, N.Savolainen, H.Sulonen, E.Valtonen                                                                                                                              |
| Hyvinkää Hospital                                                                    | L. Norvio, A.Hämäläinen                                                                                                                                                                                   |
| Iisalmi Hospital                                                                     | E.Toivanen                                                                                                                                                                                                |
| Jokilaakso Hospital, Jämsä                                                           | A.Parta, I.Pirttiniemi                                                                                                                                                                                    |
| Jorvi Hospital, Helsinki University Central Hospital                                 | S.Aranko, S.Ervasti, R.Kauppinen-Mäkelin, A.Kuusisto, T.Leppälä, K.Nikkilä, L.Pekkonen                                                                                                                    |
| Jyväskylä Health Center, Kyllö                                                       | K.Nuorva, M.Tiihonen                                                                                                                                                                                      |
| Kainuu Central Hospital, Kajaani                                                     | S.Jokelainen, K.Kananen, M.Karjalainen, P.Kemppainen, A.-M.Mankinen, A.Reponen                                                                                                                            |
| Kerava Health Center                                                                 | M.Sankari                                                                                                                                                                                                 |
| Kirkkonummi Health Center                                                            | H.Stuckey, P.Suominen                                                                                                                                                                                     |
| Kivelä Hospital, Helsinki                                                            | A.Lappalainen, M.Limatainen, J.Santaholma                                                                                                                                                                 |
| Koskela Hospital, Helsinki                                                           | A.Aimolahti, E.Huovinen                                                                                                                                                                                   |
| Kotka Health Center                                                                  | V.Ilkkä, M.Lehtimäki                                                                                                                                                                                      |
| Kouvola Health Center                                                                | E.Pälikkö-Kontinen, A.Vanhanen                                                                                                                                                                            |
| Kuopio University Hospital                                                           | E.Koskinen, T.Siitonen                                                                                                                                                                                    |
| Kuusamo Health Center                                                                | E.Huttunen, R.Ikäreimo, P.Karhapää, P.Kekäläinen, M.Laakso, T.Lakka, E.Lampainen, L.Moilanen, S. Tanskanen, L.Niskanen, U.Tuovinen, I.Vauhkonen, E.Voutilainen                                            |
| Kuusankoski Hospital                                                                 | T.Kääriäinen, E.Isopoussu                                                                                                                                                                                 |
| Laakso Hospital, Helsinki                                                            | E.Kilki, I.Koskinen, L.Riihelä                                                                                                                                                                            |
| Lahti City Hospital                                                                  | T.Meriläinen, P.Poukka, R.Savolainen, N.Uhlenius                                                                                                                                                          |
| Lapland Central Hospital, Rovaniemi                                                  | A.Mäkelä, M.Tanner                                                                                                                                                                                        |
| Lappeenranta Health Center                                                           | L.Hyvärinen, K.Lampela, S.Pöykkö, T.Rompasaari, S.Severinkangas, T.Tulokas                                                                                                                                |
| Lohja Hospital                                                                       | P. Erola, L.Härkönen, P.Linkola, T.Pekkanen, I.Pulli, E.Repo                                                                                                                                              |
| Länsi-Uusimaa Hospital, Tammisaari                                                   | T.Granlund, K.Hietanen, M.Porrassalmi, M.Saari, T.Salonen, M.Tiikkainen,                                                                                                                                  |
| Loimaa Health Center                                                                 | I.-M.Jousmaa, J.Rinne                                                                                                                                                                                     |
| Malmi Hospital, Helsinki                                                             | A.Mäkelä, P.Elora                                                                                                                                                                                         |
| Mikkeli Central Hospital                                                             | H.Lanki, S.Moilanen, M.Tilly-Kiesi                                                                                                                                                                        |
| Mänttä Regional Hospital                                                             | A.Gynther, R.Manninen, P.Nironen, M.Salminen, T.Vänttinen                                                                                                                                                 |
| North Karelian Hospital, Joensuu                                                     | I.Pirttiniemi, A.-M.Hänninen                                                                                                                                                                              |
| Nurmijärvi Health Center                                                             | U.-M.Henttula, P.Kekäläinen, M.Pietarinen, A.Rissanen, M.Voutilainen                                                                                                                                      |
| Oulaskangas Hospital, Oulainen                                                       | A.Burgos, K.Urtamo                                                                                                                                                                                        |
| Oulu Health Center                                                                   | E.Jokelainen, P.-L.Jylkkä, E.Kaarlela, J.Vuolaspuro                                                                                                                                                       |
| Oulu University Hospital                                                             | L.Hiltunen, R.Häkkinen, S.Keinänen-Kiukaanniemi                                                                                                                                                           |
| Päijät-Häme Central Hospital                                                         | R.Ikäreimo                                                                                                                                                                                                |
| Palokka Health Center                                                                | H.Haapamäki, A.Helanterä, S.Hämäläinen, V.Ilvesmäki, H.Miettinen                                                                                                                                          |
| Pieksämäki Hospital                                                                  | P.Sopanen, L.Welling                                                                                                                                                                                      |
| Pietarsaari Hospital                                                                 | V.Sevtsenko, M.Tamminen                                                                                                                                                                                   |
| Pori City Hospital                                                                   | M.-L.Holmbäck, B.Isomaa, L.Sarelin                                                                                                                                                                        |
| Porvoo Hospital                                                                      | P.Ahonen, P.Merisalo, E.Muurinen, K.Sävelä                                                                                                                                                                |
| Raahe Hospital                                                                       | M.Kallio, B.Rask, S.Rämö                                                                                                                                                                                  |
| Rauma Hospital                                                                       | A.Holma, M.Honkala, A.Tuomivaara, R.Vainionpää                                                                                                                                                            |
| Riihimäki Hospital                                                                   | K.Laine, K.Saarinen, T.Salminen                                                                                                                                                                           |
|                                                                                      | P.Aalto, E.Immonen, L.Juurinen                                                                                                                                                                            |



|                                              |                                                                                                                                                    |
|----------------------------------------------|----------------------------------------------------------------------------------------------------------------------------------------------------|
| Salo Hospital                                | A.Alanko, J.Lapinleimu, P.Rautio, M.Virtanen                                                                                                       |
| Satakunta Central Hospital, Pori             | M.Asola, M.Juhola, P.Kunelius, M.-L.Lahdenmäki, P.Pääkkönen, M.Rautavirta                                                                          |
| Savonlinna Central Hospital                  | T.Pulli, P.Sallinen, M.Taskinen, E.Tolvanen, T.Tuominen, H.Valtonen, A.Vartia, S-L.Viitanen                                                        |
| Seinäjoki Central Hospital                   | O.Antila, E.Korpi-Hyövälti, T.Latvala, E.Leijala, T.Leikkari, M.Punkari, N.Rantamäki, H.Vähävuori                                                  |
| South Karelia Central Hospital, Lappeenranta | T.Ensala, E.Hussi, R.Härkönen, U.Nyholm, J.Toivanen                                                                                                |
| Tampere Health Center                        | A.Vaden, P.Alarotu, E.Kujansuu, H.Kirkkopelto-Jokinen, M.Helin, S.Gummerus, L.Caloniuss, T.Niskanen, T.Kaitala, T.Vatanen                          |
| Tampere University Hospital                  | P. Hannula, I.Ala-Houhala, R.Kannisto, T.Kuningas, P.Lampinen, M.Määttä, H.Oksala, T.Oksanen, A.Putila, H.Saha, K.Salonen, H.Tauriainen, S.Tulokas |
| Tiirismaa Health Center, Hollola             | T.Kivelä, L.Petlin, L.Savolainen                                                                                                                   |
| Turku Health Center                          | A.Artukka, I.Hämäläinen, L.Lehtinen, E.Pyysalo, H.Virtamo, M.Viinikkala, M.Vähätalo                                                                |
| Turku University Central Hospital            | K.Breitholz, R.Eskola, K.Metsärinne, U.Pietilä, P.Saarinen, R.Tuominen, S.Äyräpää                                                                  |
| Vaajakoski Health Center                     | K.Mäkinen, P.Sopanen                                                                                                                               |
| Valkeakoski Regional Hospital                | S.Ojanen, E.Valtonen, H.Ylönen, M.Rautiainen,T.Immonen                                                                                             |
| Vammala Regional Hospital                    | I.Isomäki, R.Kroneld, L.Mustaniemi, M.Tapiolinna-Mäkelä                                                                                            |
| Vaasa Central Hospital                       | S.Bergkulla, U.Hautamäki, V-A.Myllyniemi, I.Rusk                                                                                                   |

Supplementary figures

To test time-varying effects

The time-dependent effects of the variables were tested by using the Schoenfeld residuals against the follow-up time (*cox.zph*, *Survival package in R*) (30). The assumption is that the hazard rate of an individual is constant over time. When the proportional hazards assumption of the Cox model is not fulfilled, the effect of the covariate is time-varying. When a time-varying effect emerged in an independent variable, we stratified the variable. When the effect occurred in the dependent variable, we visually inspected how the covariate on DN progression (or other outcomes) varied over time (29). Following the method of Zhang et al. (29), we stratified the follow-up time into distinct intervals, so that the proportional hazard assumption was fulfilled for each time interval.

1. Risk of DN progression in all individuals (see Table 1 in the main text)

Fig. 1A. In the Model 1 (unadjusted) time-varying effect of RH group 2 (no RH)

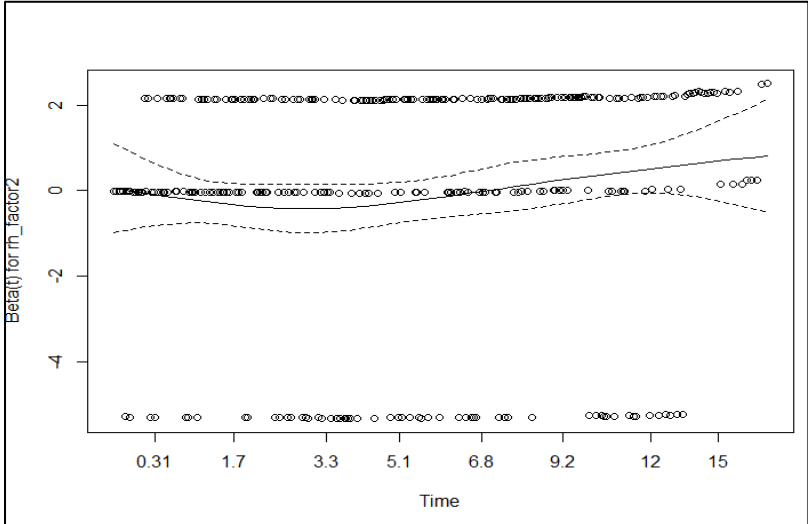

By splitting the follow-up, the proportional hazard assumption was fulfilled in each time-interval.

| Follow-up (years) | < 5.0                      | ≥ 5.0                      |
|-------------------|----------------------------|----------------------------|
| RH                | 3.49 (2.28, 5.32), <0.0001 | 3.23 (2.02, 5.15), <0.0001 |
| No RH             | 0.71 (0.46, 1.11), 0.1     | 1.26 (0.83, 1.90), 0.3     |
| Controlled BP     | Reference                  | Reference                  |

Data are HR (95% CI) and p-values (Controlled BP reference group).  
The risk of DN progression was higher in individuals with RH during the both time periods, while the risk did not differed in those with no RH compared with those who had controlled BP.

Fig. 1B. In the Model 2 (adjusted for age and sex) time-varying effect of RH group 2 (no RH)

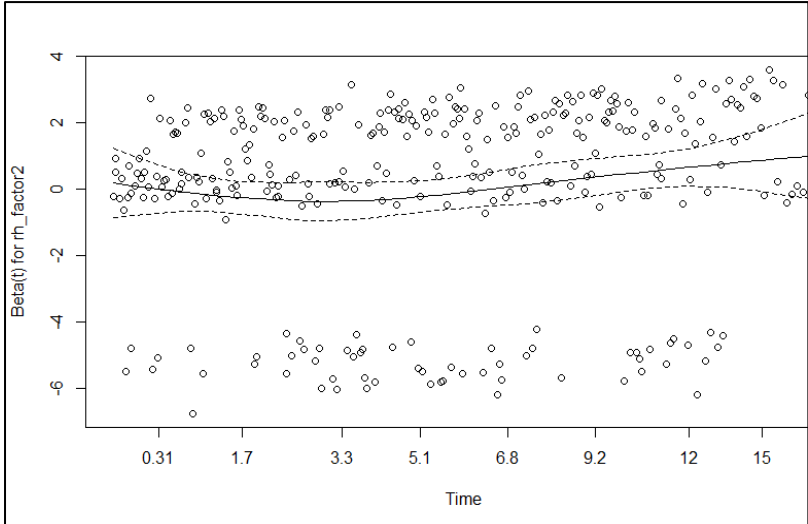

By splitting the follow-up, the proportional hazard assumption was fulfilled in each time-interval.

| Follow-up (years) | < 5.5                      | ≥ 5.5                      |
|-------------------|----------------------------|----------------------------|
| RH                | 3.63 (2.39, 5.50), <0.0001 | 4.22 (2.52, 7.04), <0.0001 |
| No RH             | 0.75 (0.49, 1.14), 0.1     | 1.53 (0.98, 2.38), 0.3     |
| Controlled BP     | Reference                  | Reference                  |

Data are HR (95% CI) and p-values (Controlled BP reference group).

The risk of DN progression was higher in individuals with RH during the both time periods, while the risk did not differed in those with no RH compared with those who had controlled BP.

## 2. The risk of DN progression in women (see Suppl. Table 2)

**Fig. 2A. In the Model 1 (unadjusted) time-varying effect of RH group 2 (no RH)**

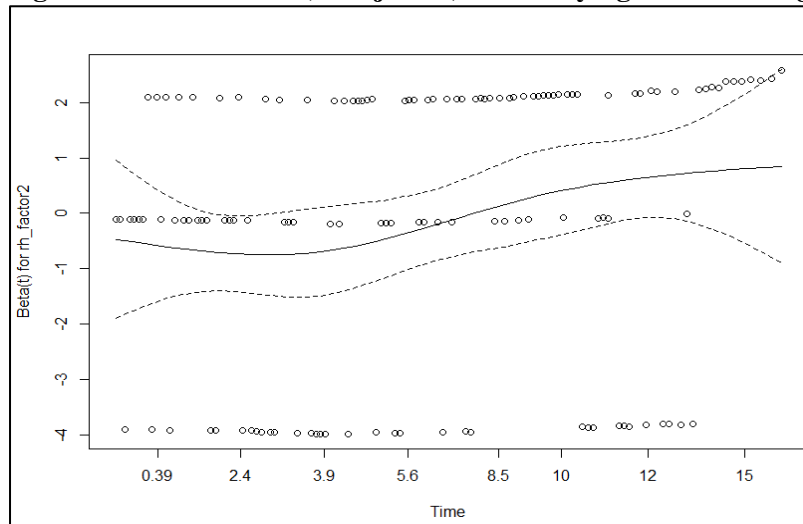

By splitting the follow-up, the proportional hazard assumption was fulfilled in each time-interval.

| Follow-up (years) | < 4.4                     | ≥ 4.4                      |
|-------------------|---------------------------|----------------------------|
| RH                | 3.19 (1.71, 5.94), 0.0003 | 4.22 (2.13, 8.38), <0.0001 |
| No RH             | 0.39 (0.19, 0.79), 0.009  | 1.43 (0.82, 2.50), 0.2     |
| Controlled BP     | Reference                 | Reference                  |

Data are HR (95% CI) and p-values (Controlled BP reference group).

The risk of DN progression in those with no RH was even lower during the first time period (< 4.4 years), compared with those who had controlled BP, but no differences were observed afterwards (≥ 4.4 years).

**Fig. 2B. In the Model 2 (adjusted for age) time-varying effect of RH group 2 (no RH)**

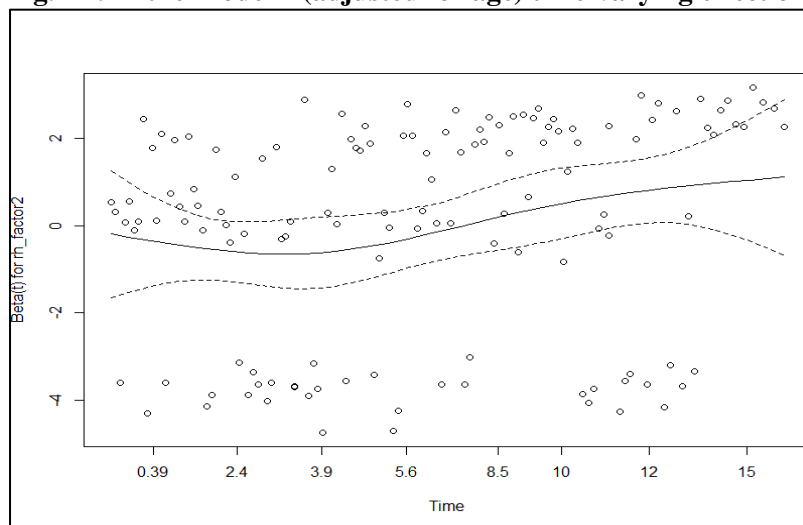

By splitting the follow-up, the proportional hazard assumption was fulfilled in each time-interval.

| Follow-up (years) | < 4.0                     | ≥ 4.0                       |
|-------------------|---------------------------|-----------------------------|
| RH                | 3.67 (1.90, 7.11), 0.0001 | 5.29 (2.71, 10.34), <0.0001 |
| No RH             | 0.34 (0.15, 0.75), 0.007  | 1.63 (0.94, 2.81), 0.08     |
| Controlled BP     | Reference                 | Reference                   |

Data are HR (95% CI) and p-values (Controlled BP reference group).

The risk of DN progression in those with no RH was even lower during the first time period (< 4.0 years), compared with those who had controlled BP, but no differences were observed afterwards ( $\geq 4.0$  years).

**Fig. 2C. In the Model 3 (adjusted for age, HBA<sub>1c</sub>, WHR, triglycerides, smoking, previous CHD, previous stroke) time-varying effect of RH group 2 (no RH)**

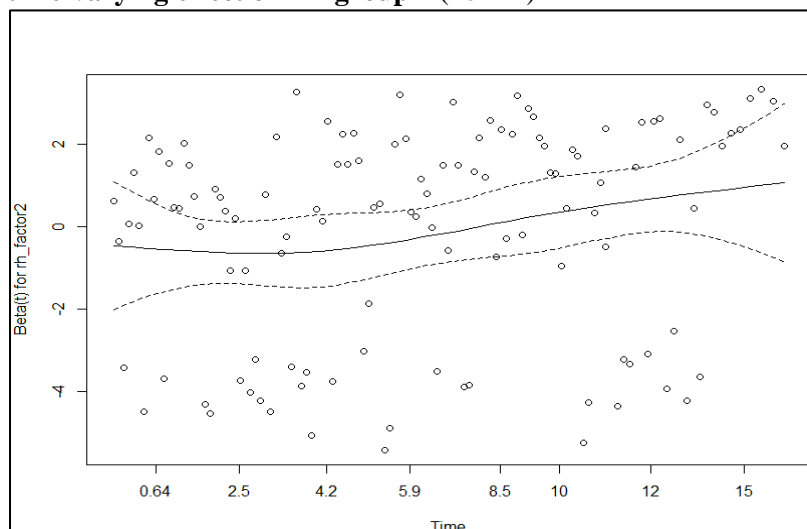

By splitting the follow-up, the proportional hazard assumption was fulfilled in each time-interval.

| Follow-up (years) | < 4.0                    | $\geq 4.0$                 |
|-------------------|--------------------------|----------------------------|
| RH                | 3.14 (1.48, 6.69), 0.003 | 4.42 (2.15, 9.11), <0.0001 |
| No RH             | 0.34 (0.14, 0.78), 0.01  | 1.41 (0.80, 2.49), 0.2     |
| Controlled BP     | Reference                | Reference                  |

Data are HR (95% CI) and p-values (Controlled BP reference group).

The risk of DN progression in those with no RH was even lower during the first time period (< 4.0 years), compared with those who had controlled BP, but no differences were observed afterwards ( $\geq 4.0$  years).

**Fig. 2D. In the Model 3 (adjusted for age, HBA<sub>1c</sub>, WHR, triglycerides, smoking, previous CHD, previous stroke, nephropathy status) time-varying effect of RH group 2 (no RH)**

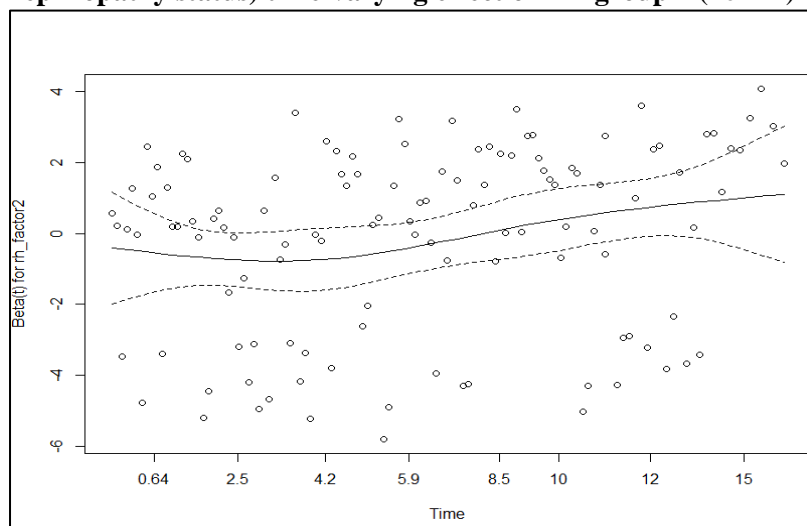

By splitting the follow-up, the proportional hazard assumption was fulfilled in each time-interval.

| Follow-up (years) | < 4.2                    | $\geq 4.2$               |
|-------------------|--------------------------|--------------------------|
| RH                | 2.47 (1.18, 5.17), 0.01  | 3.12 (1.49, 6.54), 0.003 |
| No RH             | 0.32 (0.14, 0.75), 0.009 | 1.37 (0.77, 2.44), 0.3   |
| Controlled BP     | Reference                | Reference                |

Data are HR (95% CI) and p-values (Controlled BP reference group).

The risk of DN progression in those with no RH was even lower during the first time period (< 4.2 years), compared with those who had controlled BP, but no differences were observed afterwards ( $\geq 4.2$  years).

**Fig. 2E. In the Model 3 (adjusted for age, HBA<sub>1c</sub>, WHR, triglycerides, smoking, previous CHD, previous stroke, nephropathy status, renal stage) time-varying effect of RH group 2 (no RH)**

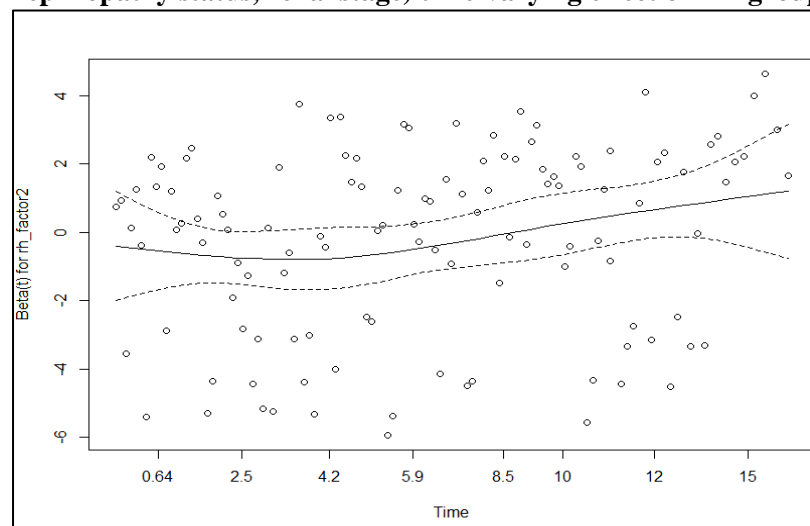

By splitting the follow-up, the proportional hazard assumption was fulfilled in each time-interval.

| Follow-up (years) | < 4.2                   | ≥ 4.2                   |
|-------------------|-------------------------|-------------------------|
| RH                | 1.78 (0.85, 3.72), 0.1  | 2.14 (1.01, 4.52), 0.05 |
| No RH             | 0.33 (0.14, 0.79), 0.01 | 1.31 (0.73, 2.36), 0.3  |
| Controlled BP     | Reference               | Reference               |

Data are HR (95% CI) and p-values (Controlled BP reference group).

The risk of DN progression in those with no RH was even lower during the first time period (< 4.2 years), compared with those who had controlled BP, but no differences were observed afterwards (≥ 4.2 years).

### 3. The risk of CHD in women (see Suppl. Table 2)

**Fig. 3A. In the Model 1 time-varying effect (unadjusted) of RH group 1 (RH)**

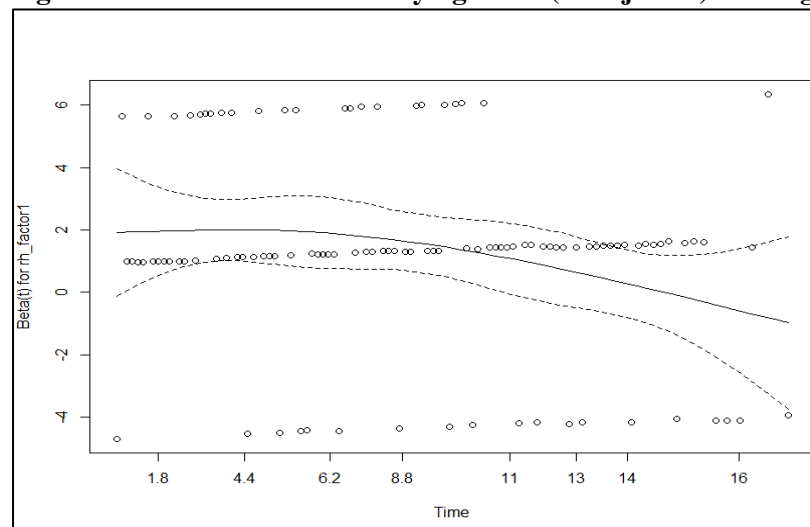

By splitting the follow-up, the proportional hazard assumption was fulfilled in each time-interval.

| Follow-up (years) | < 6.2                      | ≥ 6.2                   |
|-------------------|----------------------------|-------------------------|
| RH                | 5.85 (2.06, 16.60), 0.0009 | 2.71 (1.23, 5.97), 0.01 |
| No RH             | 2.65 (1.01, 6.95), 0.05    | 1.96 (1.07, 3.61), 0.03 |
| Controlled BP     | Reference                  | Reference               |

Data are HR (95% CI) and p-values (Controlled BP reference group).

The risk of CHD was higher in individuals with RH during the both time periods (especially during <6.2 years follow-up), and the risk was also higher in those with no RH, compared with those who had controlled BP.

**Fig. 3B. In the Model 2 (adjusted for age) time-varying effect of RH group 1 (RH)**

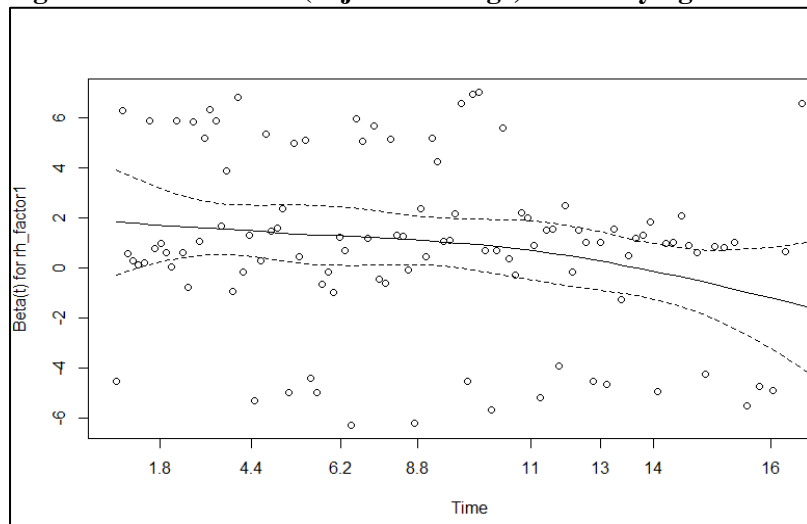

By splitting the follow-up, the proportional hazard assumption was fulfilled in each time-interval.

| Follow-up (years) | < 6.2                    | ≥ 6.2                  |
|-------------------|--------------------------|------------------------|
| RH                | 3.56 (1.24, 10.26), 0.02 | 1.76 (0.78, 3.93), 0.2 |
| No RH             | 1.66 (0.62, 4.42), 0.3   | 1.38 (0.74, 2.58), 0.3 |
| Controlled BP     | Reference                | Reference              |

Data are HR (95% CI) and p-values (Controlled BP reference group).

The risk of CHD was higher in individuals with RH only during the first time period (<6.2 years), but not afterwards, while the risk did not differ in those with no RH, compared with those who had controlled BP.

**Fig. 3C. In the Model 3 (adjusted for age, HBA<sub>1c</sub>, WHR, triglycerides, smoking, previous stroke) time-varying effect of RH group 1 (RH)**

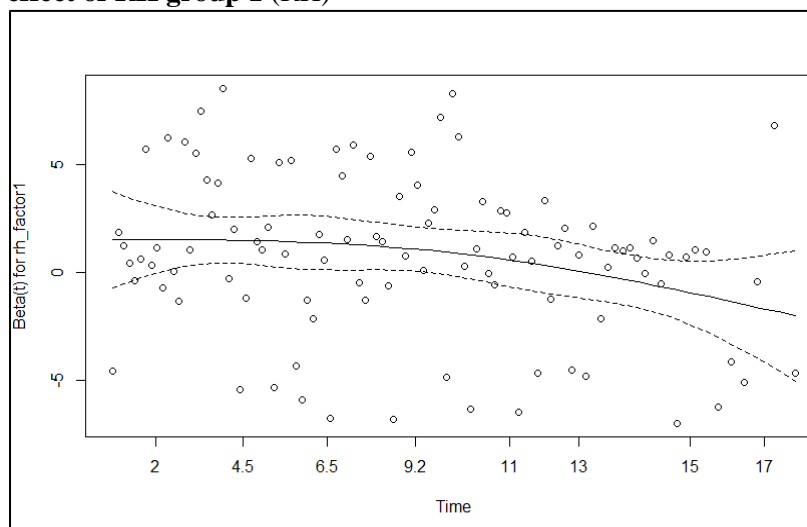

By splitting the follow-up, the proportional hazard assumption was fulfilled in each time-interval.

| Follow-up (years) | < 6.5                   | ≥ 6.5                  |
|-------------------|-------------------------|------------------------|
| RH                | 2.90 (0.99, 8.51), 0.05 | 1.65 (0.71, 3.80), 0.2 |
| No RH             | 1.46 (0.54, 3.93), 0.4  | 1.38 (0.72, 2.64), 0.3 |
| Controlled BP     | Reference               | Reference              |

Data are HR (95% CI) and p-values (Controlled BP reference group).

The CHD risk did not differ in those with RH or no RH, compared with those who had controlled BP.

**Fig. 3D. In the Model 3 (adjusted for age, HBA<sub>1c</sub>, WHR, triglycerides, smoking, previous stroke, nephropathy status) time-varying effect of RH group 1 (RH)**

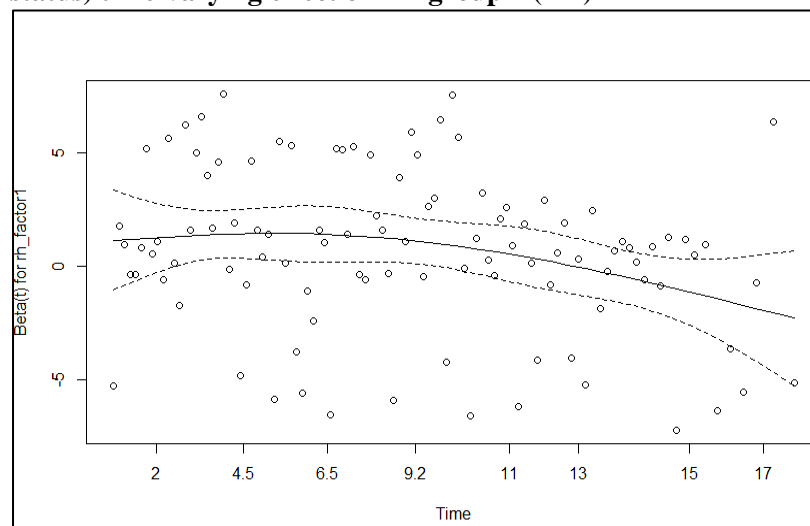

By splitting the follow-up, the proportional hazard assumption was fulfilled in each time-interval.

| Follow-up (years) | < 9.0                   | ≥ 9.0                  |
|-------------------|-------------------------|------------------------|
| RH                | 2.65 (1.05, 6.65), 0.04 | 1.15 (0.43, 3.06), 0.8 |
| No RH             | 1.45 (0.62, 3.38), 0.4  | 1.39 (0.69, 2.82), 0.3 |
| Controlled BP     | Reference               | Reference              |

Data are HR (95% CI) and p-values (Controlled BP reference group).

After full adjustment the CHD risk was higher in women with RH during the first time period (< 9 years), but not afterwards, while the risk did not differ in those with no RH, compared with those who had controlled BP.

**Fig. 3E. In the Model 3 (adjusted for age, HBA<sub>1c</sub>, WHR, triglycerides, smoking, previous stroke, nephropathy status, renal stage) time-varying effect of RH group 1 (RH)**

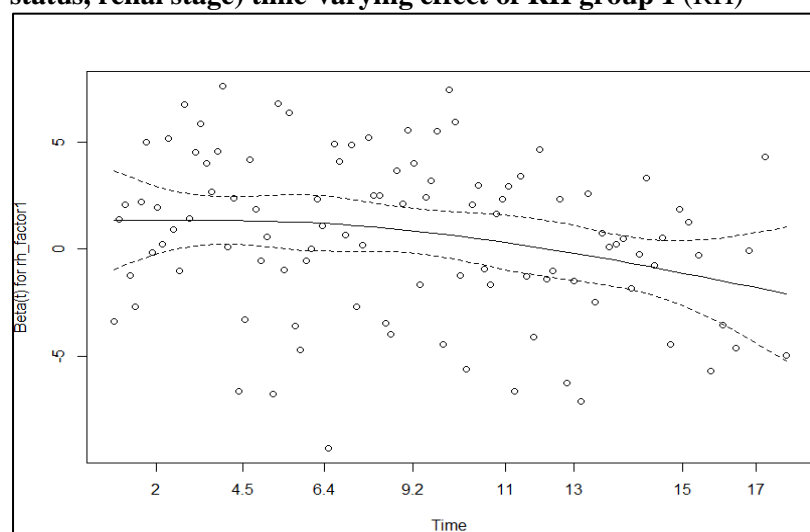

By splitting the follow-up, the proportional hazard assumption was fulfilled in each time-interval.

| Follow-up (years) | < 9.0                   | ≥ 9.0                  |
|-------------------|-------------------------|------------------------|
| RH                | 2.47 (0.98, 6.23), 0.05 | 1.09 (0.41, 2.91), 0.8 |
| No RH             | 1.45 (0.62, 3.37), 0.4  | 1.40 (0.69, 2.84), 0.3 |
| Controlled BP     | Reference               | Reference              |

Data are HR (95% CI) and p-values (Controlled BP reference group).

The CHD risk did not differ in those with RH or no RH, compared with those who had controlled BP.

#### 4. Risk of DN progression in those with normal AER and microalbuminuria (see Suppl. Table 3)

**Fig. 4A. In the Model 1 (unadjusted) time-varying effect of RH group 2 (no RH)**

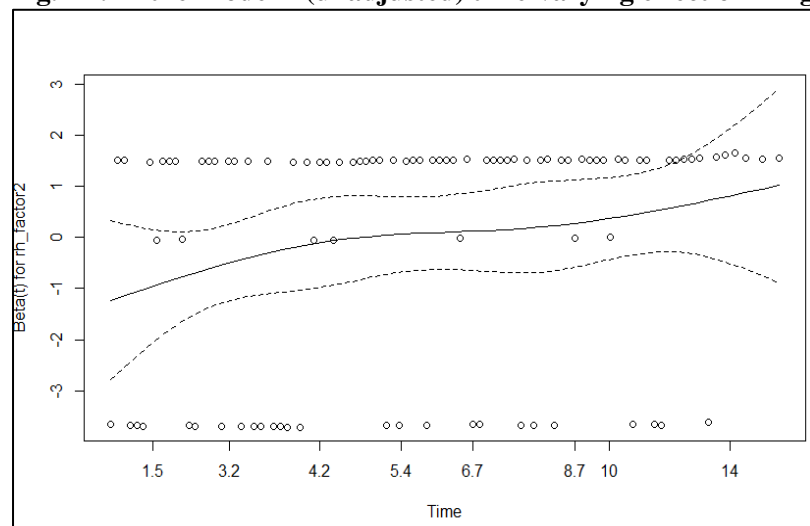

By splitting the follow-up, the proportional hazard assumption was fulfilled in each time-interval.

| Follow-up (years) | < 5.4                  | ≥ 5.4                  |
|-------------------|------------------------|------------------------|
| RH                | 0.81(0.27, 2.41), 0.7  | 1.08 (0.30, 3.93), 0.9 |
| No RH             | 0.63 (0.33, 1.18), 0.1 | 1.55 (0.77, 3.11), 0.2 |
| Controlled BP     | Reference              | Reference              |

Data are HR (95% CI) and p-values (Controlled BP reference group).

The DN progression risk did not differ in those with RH or no RH, compared with those who had controlled BP.

**Fig. 4B. In the Model 2 (adjusted for age and sex) time-varying effect of RH group 2 (no RH)**

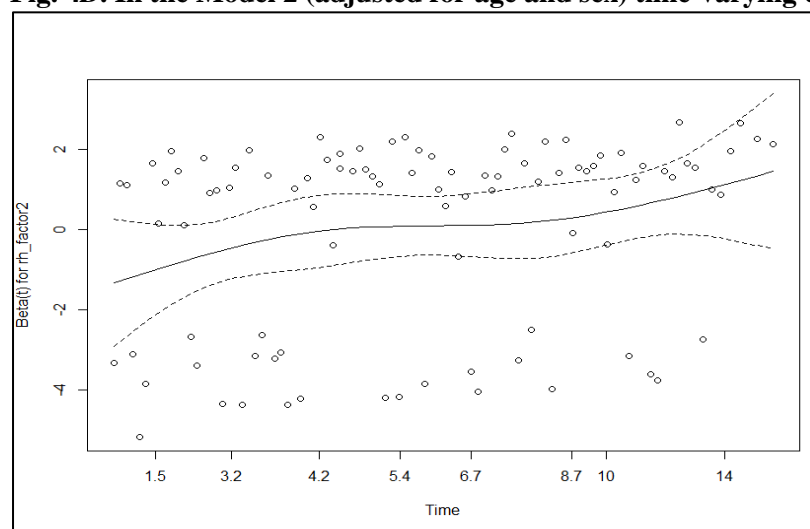

By splitting the follow-up, the proportional hazard assumption was fulfilled in each time-interval.

| Follow-up (years) | < 4.2                   | 4.2 – 7.5              | > 7.5                  |
|-------------------|-------------------------|------------------------|------------------------|
| RH                | 0.69 (0.20, 2.39), 0.5  | 0.94 (0.20, 4.55), 0.9 | 1.53 (0.30, 7.87), 0.6 |
| No RH             | 0.43 (0.21, 0.89), 0.02 | 1.40 (0.60, 3.25), 0.4 | 1.94 (0.74, 5.09), 0.2 |
| Controlled BP     | Reference               | Reference              | Reference              |

Data are HR (95% CI) and p-values (Controlled BP reference group).

During the first 4.2 years the risk of DN progression was slightly lower in those with no RH, while no differences were observed in those with RH, compared with those who had controlled BP.

## 5. Risk of CHD in individuals with macroalbuminuria (see Suppl. Table 4.)



**Fig. 5A. In the Model 2 (adjusted for age and sex) time-varying effect of RH group 1 (RH)**

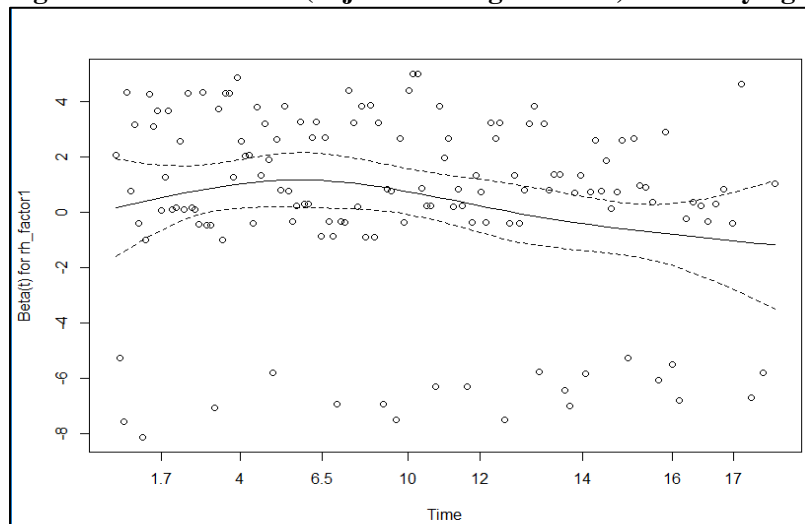

By splitting the follow-up, the proportional hazard assumption was fulfilled in each time-interval.

| Follow-up (years) | < 4.0                  | 4.0 – 10.0              | > 10.0                 |
|-------------------|------------------------|-------------------------|------------------------|
| RH                | 1.81 (0.59, 5.53), 0.3 | 2.60 (0.87, 7.77), 0.09 | 0.89 (0.42, 1.87), 0.8 |
| No RH             | 1.03 (0.34, 3.12), 1.0 | 1.60 (0.54, 4.70), 0.4  | 1.12 (0.59, 2.14), 0.7 |
| Controlled BP     | Reference              | Reference               | Reference              |

Data are HR (95% CI) and p-values (Controlled BP reference group).

The CHD risk did not differed in those with RH or no RH, compared with those who had controlled BP.

## 6. Risk of DN progression in those with eGFR $\geq 60$ ml/min/1.73 m<sup>2</sup> (see Suppl. Table 5.)

**Fig. 6A. In the Model 1 (unadjusted) time-varying effect of RH group 1 (RH)**

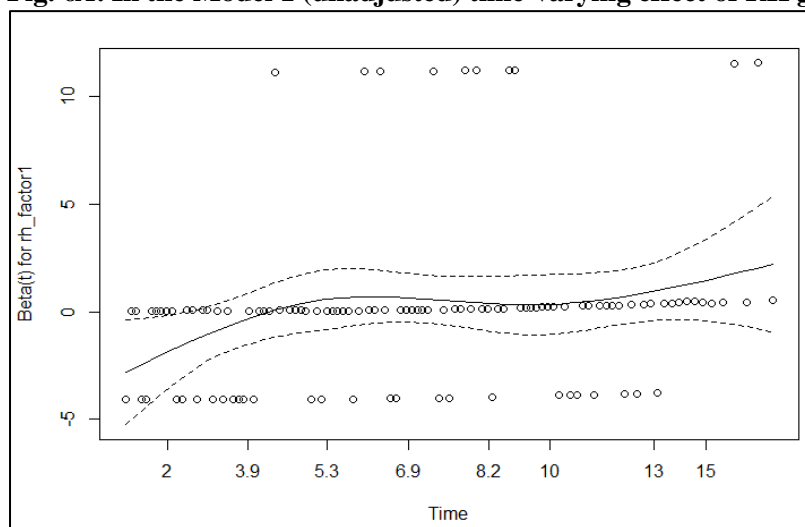

By splitting the follow-up, the proportional hazard assumption was fulfilled in each time-interval.

| Follow-up (years) | < 5.3                  | 5.3 – 10.0               | > 10.0                 |
|-------------------|------------------------|--------------------------|------------------------|
| RH                | 0.20 (0.03, 1.56), 0.1 | 3.54 (1.19, 10.53), 0.02 | 1.11 (0.23, 5.34), 0.9 |
| No RH             | 0.70 (0.36, 1.35), 0.3 | 1.91(0.79, 4.62), 0.1    | 1.31 (0.56, 3.08), 0.5 |
| Controlled BP     | Reference              | Reference                | Reference              |

Data are HR (95% CI) and p-values (Controlled BP reference group).

In individuals with eGFR  $\geq 60$  ml/min/1.73 m<sup>2</sup> the risk of DN progression was higher in those with RH during the time-period of 5.3–10.0 years, but no differences were observed between the groups before and after that time period.

**Fig. 6B. In the Model 2 (adjusted for age and sex) time-varying effect of RH group 1 (RH)**

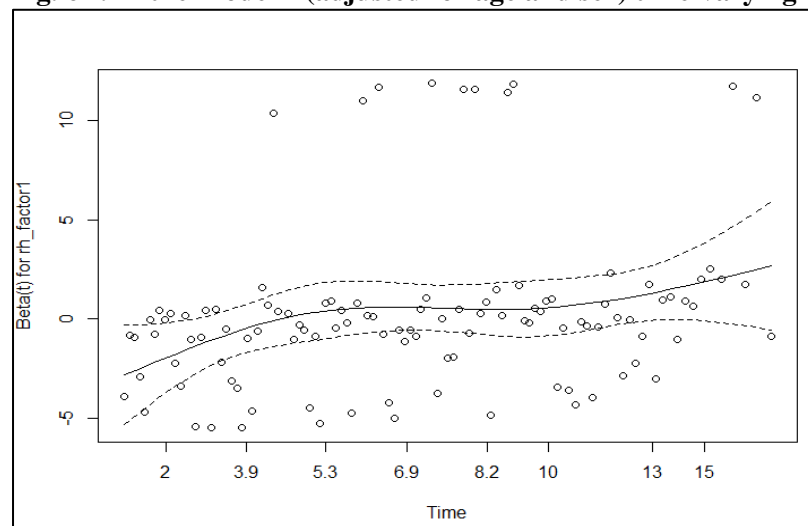

By splitting the follow-up, the proportional hazard assumption was fulfilled in each time-interval.

| Follow-up (years) | < 5.3                  | 5.3 – 10.0             | > 10.0                 |
|-------------------|------------------------|------------------------|------------------------|
| RH                | 1.00 (0.33, 3.08), 1.0 | 1.09 (0.22, 5.31), 0.9 | 1.08 (0.12, 9.74), 0.9 |
| No RH             | 0.71 (0.37, 1.36), 0.3 | 1.38 (0.58, 3.24), 0.5 | 1.65 (0.54, 5.00), 0.4 |
| Controlled BP     | Reference              | Reference              | Reference              |

Data are HR (95% CI) and p-values (Controlled BP reference group).

The DN progression risk did not differ in those with RH or no RH, compared with those who had controlled BP during the follow-up.

**Fig. 6C. In the Model 3 (adjusted for age, sex, HBA<sub>1c</sub>, waist, triglycerides, smoking, previous CHD and stroke) time-varying effect of RH group 1 (RH)**

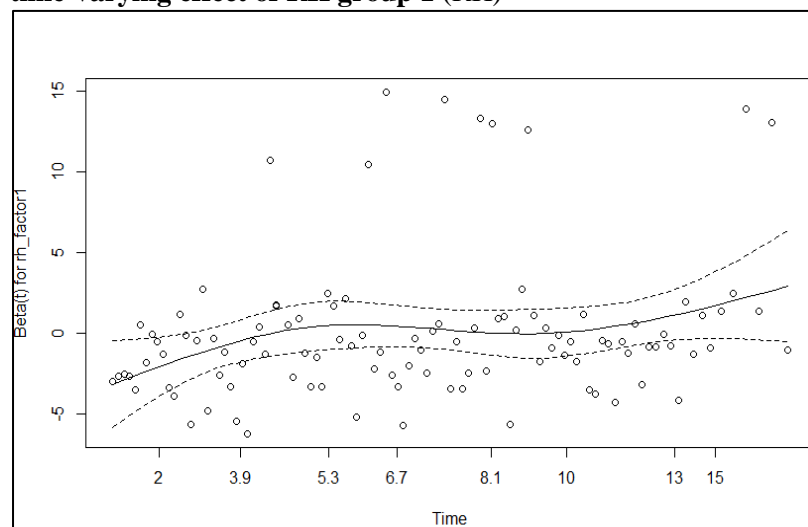

By splitting the follow-up, the proportional hazard assumption was fulfilled in each time-interval.

| Follow-up (years) | < 5.5                  | 5.5 – 10.0             | > 10.0                 |
|-------------------|------------------------|------------------------|------------------------|
| RH                | 0.19 (0.02, 1.47), 0.1 | 2.49 (0.78, 7.91), 0.1 | 0.89 (0.18, 4.38), 0.9 |
| No RH             | 0.67 (0.34, 1.32), 0.2 | 1.71 (0.70, 4.17), 0.2 | 0.98 (0.41, 2.37), 1.0 |
| Controlled BP     | Reference              | Reference              | Reference              |

Data are HR (95% CI) and p-values (Controlled BP reference group).

The DN progression risk did not differ in those with RH or no RH, compared with those who had controlled BP during the follow-up.

**Fig. 6D. In the Model 4 (adjusted for age, sex, HBA<sub>1c</sub>, waist, triglycerides, smoking, nephropathy status, previous CHD and stroke) time-varying effect of RH group 1 (RH)**

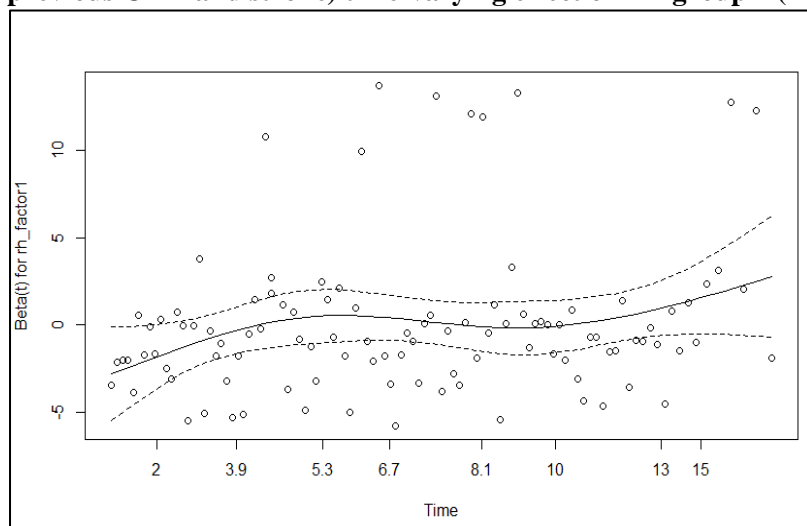

By splitting the follow-up, the proportional hazard assumption was fulfilled in each time-interval.

| Follow-up (years) | < 5.5                  | 5.5 – 10.0             | > 10.0                 |
|-------------------|------------------------|------------------------|------------------------|
| RH                | 0.19 (0.02, 1.52), 0.1 | 2.54 (0.80, 8.10), 0.1 | 0.91 (0.18, 4.46), 0.9 |
| No RH             | 0.66 (0.34, 1.32), 0.2 | 1.71 (0.70, 4.16), 0.2 | 0.98 (0.40, 2.36), 1.0 |
| Controlled BP     | Reference              | Reference              | Reference              |

Data are HR (95% CI) and p-values (Controlled BP reference group).

The DN progression risk did not differ in those with RH or no RH, compared with those who had controlled BP during the follow-up.

## 7. The Risk of DN progression in all individuals with the BP threshold of < 130/80 mmHg (Suppl. Table 7.)

**Fig. 7A. In the Model 1 (unadjusted) time-varying effect of RH group 1 (RH)**

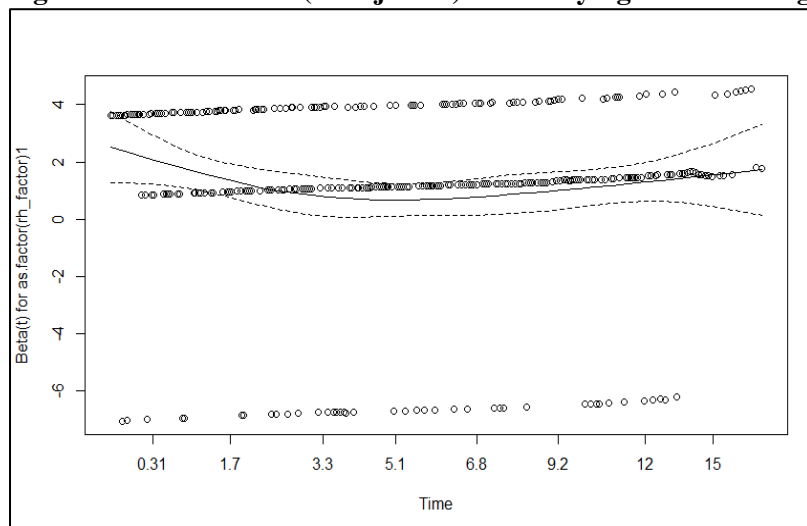

By splitting the follow-up, the proportional hazard assumption was fulfilled in each time-interval.

| Follow-up (years) | < 5.1                      | ≥ 5.1                      |
|-------------------|----------------------------|----------------------------|
| RH                | 3.44 (2.09, 5.65), <0.0001 | 2.91 (1.73, 4.89), <0.0001 |
| No RH             | 0.75 (0.46, 1.24), 0.3     | 1.11 (0.69, 1.77), 0.7     |
| Controlled BP     | Reference                  | Reference                  |

Data are HR (95% CI) and p-values (Controlled BP reference group).

The risk of DN progression was higher in individuals with RH during the both time periods, while the risk did not differ in those with no RH compared with those who had controlled BP.
